# Supplementary material
Source: Research Square preprint supplement (doi:10.21203/rs.3.rs-9200793/v1)
Supplement: Supplementary file 1 [file c278cace11757b1728417b95.docx]

**Supplemental materials**

**Table S1.** Mapping CFIR determinants to components of the implementation strategy

| **CFIR domain** | **Key barriers** | **Strategies** | **Component implemented** |
| --- | --- | --- | --- |
| **Individuals (Deliverers)** | Limited knowledge and counseling confidence | Educational meetings; decision support | CME training; BPA |
| **Individual (Recipients)** | Cost, venipuncture burden, delayed results | Alternative screening modalities | POC HBsAg testing |
| **Inner Setting** | Screening not embedded in workflow; high cognitive load  Centralized laboratory processing leading to delayed turnaround | Clinical reminder systems  ternative screening modalities | BPA  POC HBsAg testing |
| **Outer Setting** | Sreening cost is high and not reimbursed | Alternative screening modalities | POC HBsAg testing |

**Table S2.** CFIR-based contextual factors influencing the implementation strategy

| **CFIR Domain** | **CFIR Construct** | **Themes** | **Relevant strategy components** | **Illustrative quotes or obervations in Vietnamese** | **Illustrative quotes or obervations in English** |
| --- | --- | --- | --- | --- | --- |
| **Outer setting** | Financing | Lack of insurance reimbursement for laboratory-based HBV screening created a structural financial barrier, limiting the impact of CME and BPA despite increased provider awareness. | CME, BPA | "...thì hầu như bệnh nhân cũng thắc mắc là tại sao tôi đóng tiền bảo hiểm mà lại bắt tôi trả tiền, rất là nhiều."  — IDI, physician 1  "Thành ra cái mục đích của mình khi tham gia những bài giảng đấy là để nắm được cái chỉ định vấn đề về viêm gan B, viêm gan C khi nào cần làm và tầm soát như thế nào và giới thiệu bệnh nhân được đi khám chuyên khoa. Chứ còn mình… thực tế thì qua nội tổng hợp phòng khám thì mình cũng ít khi điều trị những bệnh nhân viêm gan B do nó liên quan đến vấn đề bảo hiểm y tế nó không có chi trả khi mà bệnh nhân khám viêm gan B tại khoa nội tổng hợp, phòng khám nội tổng hợp."  — IDI, physician 2 | “…most patients ask why they have health insurance but are still required to pay out of pocket, a lot of money.”  — IDI, physician 1  “The purpose of attending those training sessions was to understand the indications for hepatitis B and C, when to test, how to screen, and how to refer patients to specialist care. However…in practice, in general internal medicine clinics, we rarely manage hepatitis B patients because insurance does not cover care when patients are seen in this setting.”  — IDI, physician 2 |
| **Inner Setting** | Physical Infrastructure | Physical distance between consultation and laboratory reduces follow-through after counseling. | CME, BPA | "Cái thứ hai là về địa điểm mà lấy xét nghiệm nó… nó hơi xa so với phòng khám. Nếu mà rút ngắn cái khoảng cách hơn thì có lẽ bệnh nhân sẽ sẵn sàng hơn. Từ cái chỗ mà bệnh nhân khám ở chỗ mình đến chỗ xét nghiệm mà cách nhau chỉ có vài ba bước chân thì anh nghĩ là tư vấn thì hầu như ca nào người ta cũng ok hết. Chứ mà đi xét nghiệm mà còn phải chạy một quãng đường khoảng 200 mét thì nó cũng khá là bất tiện."  — IDI, physician 1 | “Another issue is the location of the testing area…it is quite far from the consultation room. If the distance were shorter, patients would likely be more willing. If the testing site were just a few steps away, almost every patient would agree after counseling. But having to walk about 200 meters is quite inconvenient.”  — IDI, physician 1 |
|  | Relative priority | Preventive screening was deprioritized in insurance-driven visits focused on acute or existing complaints. | CME, BPA | "...ở bệnh viện thì rõ ràng cái thời gian mà bác sĩ tư vấn bệnh nhân có vẻ như nó không có đủ nhiều để mình làm được cái chuyện đó, ngoài cái chuyện mình xử lý cái bệnh nền hoặc là bệnh cấp tính nó đã hết thời gian ở phòng khám, nhất là phòng khám bảo hiểm thì nó lại không có thời gian đầy đủ hơn cho cái việc mà tư vấn thêm những xét nghiệm cần thiết ngoài cái chuyên môn chính của mình."  — IDI, physician 4 | “In the hospital setting, the time available for physicians to counsel patients is seemingly limited, after dealing with chronic conditions or acute issues, there is no time left in the consultation, especially in insurance-based clinics, where there is even less time for additional counseling beyond the main clinical issue.”  — IDI, physician 4 |
|  | Compatibility | High patient volume and time pressure constrained in-depth counseling and reduced consistent enactment of BPA prompts.  BPA alerts were variably enacted. Prompts did not uniformly translate into counseling or test ordering, particularly during busy sessions. | CME, BPA  BPA | "Thật ra khi mà bệnh nhân đang đông thì… mình thường mình sẽ lướt qua, mình thường mình sẽ lướt qua cho tới lượt bệnh nhân khác khám, tại vì khi mà mình đã tư vấn một bệnh nhân mà làm viêm gan thì mình cũng phải dừng lại vài nhịp để mình tư vấn cho bệnh nhân đồng ý. Ví dụ như có những bệnh nhân người ta đồng ý liền, nhưng mà có những bệnh nhân người ta sẽ thắc mắc, người ta sẽ hỏi thêm, hỏi thêm, thì cái đó cũng ảnh hưởng một phần nhỏ trong cái… cái vấn đề mà mình khám bệnh liên tục khi mà số lượng bệnh nhân rất là đông á."  — IDI, physician 5  “nhắc nhở BPA có xuất hiện nhưng điều dưỡng tắt pop-up, không đọc BPA với bệnh nhân, không tư vấn làm xét nghiệm và không chỉ định POC…”  — NPO (observed case) | “Honestly, when the clinic is very busy… we have to move quickly from one patient to the next, because counseling for hepatitis testing requires us to pause and explain things carefully. For instance, some patients agree immediately, but others ask many questions… which takes additional time and affects workflow when patient volume is high.”  — IDI, physician 5  “The BPA reminder appeared, but the nurse closed the pop-up, did not read it to the patient, did not provide counseling, and did not order POC testing.”  — NPO (observed case) |
| **Individuals** | Innovation deliverers | CME improved perceived appropriateness and knowledge of HBV screening, but structural constraints limited behavioral change. | CME | "Dạ em thấy buổi học nó cũng rất là hay với lại lợi ích khi hướng dẫn tư vấn cho bệnh nhân mà tầm soát về viêm gan siêu vi B, để điều trị sớm hơn"  — IDI, nurse 1  "Thành ra cái mục đích của mình khi tham gia những bài giảng đấy là để nắm được cái chỉ định vấn đề về viêm gan B, viêm gan C khi nào cần làm và tầm soát như thế nào và giới thiệu bệnh nhân được đi khám chuyên khoa. Chứ còn mình… thực tế thì qua nội tổng hợp phòng khám thì mình cũng ít khi điều trị những bệnh nhân viêm gan B do nó liên quan đến vấn đề bảo hiểm y tế nó không có chi trả khi mà bệnh nhân khám viêm gan B tại khoa nội tổng hợp, phòng khám nội tổng hợp."  — IDI, physician 2 | “I found the training session very useful and help guiding us on how to counsel patients for hepatitis B screening and promote earlier treatment.”  — IDI, nurse 1  “So the purpose of attending those training sessions was to understand the indications for hepatitis B and C, when to test, how to screen, and how to refer patients to specialist care. However… in practice, in general internal medicine clinics, we rarely manage hepatitis B patients because insurance does not cover care when patients are seen in this setting.”  — IDI, physician 2 |
|  | Innovation Recipients | Fear of venipuncture and time burden reduce uptake; simplified POC procedure increases acceptability.  Pre-defined visit goals constrain acceptance of additional preventive screening.    Out-of-pocket cost reduces willingness for laboratory-based screening.  Low Perceived Susceptibility Among Asymptomatic Patients  Limited patient understanding interrupts progression from screening prompt to testing. | CME, BPA, POC HBsAg | “Bệnh nhân cảm thấy không đau, như kiến cắn.”  — Patient exit interview, patient 01  “Bệnh nhân cảm thấy đau nhẹ, giống thử đường huyết.”  — Patient exit interview, patient 02  “Bệnh nhân thấy xét nghiệm nhanh, thuận tiện.”  — Patient exit interview, patient 09  "...tức là người ta muốn khám những cái gì người ta đã có… có cái dự tính ban đầu rồi, thì người ta chỉ muốn khám theo cái gói khám đấy. Mà rồi sau đó mình tư vấn thêm những cái khác thì đa số người ta sẽ từ chối để người ta làm những cái mà người ta mong muốn trước. "  — IDI, physician 2  "Có, cũng có vài trường hợp là người ta bận quá ví dụ như là người ta không có thời gian có những anh chị mà người ta đi làm công ty á chị, người ta chỉ tranh thủ tới người ta khám một chút xíu hoặc là 15 đến 30 phút rồi người ta về thì người ta không có thời gian nên là người ta…"  — IDI, nurse 2  "...đa số từ chối, như chia sẻ với chị lúc nãy là người ta sợ mất thời gian, người ta sợ lấy máu nhiều và có trường hợp thì người ta không có nhu cầu làm."  — IDI, physician 2  "...thì hầu như bệnh nhân cũng thắc mắc là tại sao tôi đóng tiền bảo hiểm mà lại bắt tôi trả tiền, rất là nhiều."  — IDI, physician 1  "Đúng thiệt rõ ràng là tư vấn tầm soát thì hầu như ít khi mình làm được… nếu mà vô xét nghiệm tổng quát mình khơi khơi mình đi tư vấn cho đi làm cái này thì tự nhiên bệnh nhân phải bỏ ra 390 nghìn để đi làm bộ 3 này thì cũng hơi khó, thì một số bệnh nhân người ta sẽ không đồng ý." — IDI, physician 4  "Thì cái vấn đề mà men gan tăng nhưng mà bệnh nhân không có những mệt mỏi hay là vàng da, vàng mắt không có tiền căn gia đình, có người bị bệnh viêm gan, xơ gan, ung thư gan thì đa số người ta nghĩ cái vấn đề đó nó không quan trọng khi mà người ta bỏ ra một số tiền tới gần 500 ngàn."  — IDI, physician 2  "Thì cái vấn đề tầm soát thì mình nghĩ… thì thực tế mình thấy những ca men gan tăng kéo dài trước đó chưa làm thì bệnh nhân sẽ đồng ý dễ dàng hơn so với những trường hợp mới khám lần đầu."  — IDI, physician 2  “BPA có xuất hiện và điều dưỡng đọc BPA với bệnh nhân, tuy nhiên bệnh nhân không hiểu câu hỏi của điều dưỡng… không tiếp tục tư vấn làm xét nghiệm và không chỉ định POC…”  — NPO (observed case) | “It didn’t hurt—just like an ant bite.”  — Patient exit interview, patient 01  “It was slightly painful, similar to a blood glucose test.”  — Patient exit interview, patient 02  “The test is fast and convenient.”  — Patient exit interview, patient 09  “Patients usually come in with a predefined plan of what they want … to be examined for. When we suggest additional tests, most of them decline because they want to prioritize their original concerns.”  — IDI, physician 2  “Yes, there are some cases where patients are simply too busy—for example, those working in companies. They only come in briefly, sometimes for just 15 to 30 minutes, and then leave, so they do not have time for additional testing...”  — IDI, nurse 2  “…most patients refuse, like I said they are concerned about time, about having blood drawn, or simply feel they do not need the test.”  — IDI, physician 2  “…patients frequently question why do they pay for health insurance but still have to pay out of pocket, a lot of money.”  — IDI, physician 1  “Yes in reality we rarely manage to provide screening counseling…. if we suggest additional tests, patients may have to pay around 390,000 VND for the panel, which makes it difficult, many will refuse.”  — IDI, physician 4  “When patients have elevated liver enzymes but no symptoms, no jaundice, and no family history of liver disease, most do not consider it important enough to spend nearly 500,000 VND.”  — IDI, physician 2  “Regarding screening… in practice we observe that patients with persistently elevated liver enzymes who have not previously been tested are more likely to agree to screening compared to those presenting for the first time.”  — IDI, physician 2  “The BPA alert appeared and the nurse read it to the patient; however, the patient did not understand the question. Counseling was not continued, and no POC test was ordered...”  — NPO (observed case) |
| **Innovation Characteristics** | Relative advantage | POC testing perceived as faster, less invasive, and more convenient, increasing immediate acceptance. | POC HBsAg | “Bệnh nhân cảm thấy không đau, như kiến cắn.”  — Patient exit interview, patient 01  “Bệnh nhân cảm thấy đau nhẹ, giống thử đường huyết.”  — Patient exit interview, patient 02  “Bệnh nhân thấy xét nghiệm nhanh, thuận tiện.”  — Patient exit interview, patient 09  "...thời gian trả kết quả nó nhanh, so với kia thì cũng gần cả ngày cái này thì có mấy chút phút là xong rồi."  — IDI, physician 1  "...mình thấy bệnh nhân thấy có vẻ là vui hơn, bệnh nhân thích lấy máu đầu ngón tay hơn là lấy máu tĩnh mạch."  — IDI, physician 5 | “It didn’t hurt—just like an ant bite.”  — Patient exit interview, patient 01  “It was slightly painful, similar to a blood glucose test.”  — Patient exit interview, patient 02  “The test is fast and convenient.”  — Patient exit interview, patient 09  “…the turnaround time is much faster, previously it took almost a full day, whereas now it only takes a few minutes.”  — IDI, physician 1  “…we observed that patients seem more satisfied, they tend to prefer finger-prick testing over venous blood draws.”  — IDI, physician 5 |
|  | Cost | Removal of patient cost for POC testing eliminated financial hesitation and shifted decision-making toward immediate testing. | POC HBsAg | Bệnh nhân cảm thấy lấy máu tĩnh mạch dễ chịu hơn, chỉ chọn khi có giá thấp hơn lấy máu tĩnh mạch  — Patient interview, patient 6  "Bệnh nhân cảm thấy là tốt, tốt quá, tại vì được xét nghiệm miễn phí thì ai cũng cứ thích. Tại vì đa phần bệnh nhân phòng khám anh toàn là bệnh nhân bảo hiểm cả."  — IDI, physician 1  "Cái rào cản lớn nhất là cái chi phí đó em. Tại vì hầu như khi nhắc tới mất tiền là những bệnh nhân bảo hiểm thì người ta cũng do dự. Trừ những trường hợp mà người ta thấy bệnh người ta có vẻ nặng thì người ta sẽ ok. Tức là nghi ngờ nhiễm viêm gan B thì người ta sẽ ok. Còn những trường hợp kiểu xét nghiệm tổng quá thì người ta cũng không có sẵn sàng lắm. Bây giờ có cái xét nghiệm miễn phí thì người ta rất là ok."  — IDI, physician 1 | “The patient felt that venous blood draw was more comfortable and would only choose finger-prick testing if it were cheaper than venous testing.”  — Patient interview, patient 6  “Patients feel very positive about it, since free testing is always well received. Most patients in our clinic are covered by insurance, so cost matters a lot.”  — IDI, physician 1  “Cost is the biggest barrier. When patients hear they have to pay, those with insurance tend to hesitate, unless they perceive their condition as serious, such as suspected hepatitis B. For general screening, they are usually not very willing. Now that the test is free, they are much more willing.”  — IDI, physician 1 |
|  | Complexity | Repeated or interruptive BPA alerts contributed to alert fatigue and selective dismissal during high workload periods. | BPA | "Có một số bất tiện như là… nhiều… nhiều ca cứ nhắc đi, nhắc lại, nhưng mà những ca đó thì bệnh nhân kiểu chưa có muốn xét nghiệm. Nhưng mà lần sau nó vẫn cứ nhắc… thì nhiều khi đang làm là phải thêm một thao tác là tắt cái đó đi cũng hơi bất tiện."  — IDI, physician 1  "...đôi khi mà… ví dụ như buổi sáng bệnh đang đông quá mà ca nào vô nó cũng nhắc nhở vậy thì cũng hơi bất tiện, tốn thời gian của mình." — IDI, physician 1 | “There are some inconveniences… for many cases, the alert keeps appearing repeatedly even when patients are not interested in testing. The next time, it still appears again…so while working, we have to take an extra step to close it, which is somewhat inconvenient.”  — IDI, physician 1  “sometimes… for example during busy morning sessions, when every patient triggers an alert, it becomes inconvenient and time-consuming.”  — IDI, physician 1 |
|  | Evidence-base and Adaptability | Uncertainty about POC test accuracy and insurance recognition influences provider confidence in use. | POC HBsAg | "Thật ra đối với bác sĩ thì mình quan tâm là cái độ nhạy và cái độ đặc hiệu của cái test nhanh này. Với lại cái thứ 2 là bảo hiểm y tế có công nhận là khi kết quả test nhanh đó chạy ra là dương tính rồi mình có được hưởng những xét nghiệm những điều trị kèm theo sau đó hay không."  — IDI, physician 5  “Chị cũng muốn kiểm chứng lại chút xíu thì chị vẫn sẽ nếu mà tư vấn bệnh nhân đồng ý test thì chị vẫn sẽ tư vấn làm lại xét nghiệm bên chị."  — IDI, physician 3 | “From a physician’s perspective, we are concerned about the sensitivity and specificity of the rapid test. Another issue is whether health insurance recognizes the result if a rapid test is positive, whether subsequent tests and treatment will be covered.”  — IDI, physician 5  “I would still want to confirm the result, if the patient agrees to the rapid test, I would also recommend repeating the test in the laboratory.”  — IDI, physician 3 |
| **Implementation Process** | **Adaptation** | Providers selectively engage with BPA and counseling based on workload and patient flow. | **BPA, CME** | "Nếu mà số lượng bệnh mà đông quá hoặc là đông quá thì có thể là chừng vài ca mình bỏ qua thôi. Dạ. Còn bình thường thì cũng sẽ tư vấn."  — IDI, nurse 1 | “When patient volume is very high, we may skip a few cases. Otherwise, we generally still try to provide counseling.”  — IDI, nurse 1 |
| *Abbreviation: IDI – In-depth interview; NPO – Non-participatory observation; BPA – Best Practice Advisory; CME – Continued Medical Education; POC – Point of care* | | | | | |
